## Retraction

**Retraction: MicroRNA-145 down-regulates mucin 5AC to alleviate airway remodeling and targets EGFR to inhibit cytokine expression****Zhe Cheng<sup>1</sup>, Ling-Ling Dai<sup>1</sup>, Xi Wang<sup>1</sup>, Liu-Qun Jia<sup>1</sup>, Xiao-Gang Jing<sup>1</sup>, Peng-Fei Li<sup>1</sup>, Meng Liu<sup>1</sup>, Huan Wang<sup>1</sup> and Lin An<sup>1</sup>**<sup>1</sup>Department of Respiratory and Critical Care Medicine, Institute of Clinical Medicine, The First Affiliated Hospital of Zhengzhou University, Zhengzhou 450052, P.R. China**Published:** February 05, 2025**Copyright:** © 2025 Cheng et al. This is an open access article distributed under the terms of the [Creative Commons Attribution License](#) (CC BY 4.0), which permits unrestricted use, distribution, and reproduction in any medium, provided the original author and source are credited.

**This article has been retracted:** Oncotarget has completed its investigation of this paper, initiated after the request of corresponding author Zhe Cheng to retract this article. Upon investigation, several instances of image duplication were found. In particular, Figure 4, contains images also found in Figure 4 (HE staining), Figure 5 (Masson staining) and Figure 6 (PAS staining) of an earlier paper [1]. Figure 4, HE staining panel and Masson staining panel, also contains images found in Figure 3A and 3C of a paper published concurrently [2] and in Figure 4 of [3]. The authors also reused some of the HE staining and PAS staining images in later published paper [4], which was recently retracted. As a result, the Editorial decision was made to retract this paper. Oncotarget has reached out multiple times to all authors to confirm this retraction, but received no response.

Original article: Oncotarget. 2017; 8:46312–46325. <https://doi.org/10.18632/oncotarget.17933>**REFERENCES**

1. Ye L, Mou Y, Wang J, Jin ML. Effects of microRNA-19b on airway remodeling, airway inflammation and degree of oxidative stress by targeting TSLP through the Stat3 signaling pathway in a mouse model of asthma. *Oncotarget*. 2017; 8:47533–46. <https://doi.org/10.18632/oncotarget.17258>. [PubMed]
2. Wu DQ, Wu HB, Zhang M, Wang JA. Effects of Zinc Finger Protein A20 on Lipopolysaccharide (LPS)-Induced Pulmonary Inflammation/Anti-Inflammatory Mediators in an Acute Lung Injury/Acute Respiratory Distress Syndrome Rat Model. *Med Sci Monit*. 2017; 23:3536–45. <https://doi.org/10.12659/msm.901700>. [PubMed]
3. Liao HD, Mao Y, Ying YG. The involvement of the laminin-integrin  $\alpha7\beta1$  signaling pathway in mechanical ventilation-induced pulmonary fibrosis. *J Thorac Dis*. 2017; 9:3961–72. <https://doi.org/10.21037/jtd.2017.09.60>. [PubMed]
4. Cheng Z, Wang X, Dai LL, Jia LQ, Jing XG, Liu Y, Wang H, Li PF, An L, Liu M. Thymic Stromal Lymphopoietin Signaling Pathway Inhibition Attenuates Airway Inflammation and Remodeling in Rats with Asthma. *Cell Physiol Biochem*. 2018; 47:1482–96. <https://doi.org/10.1159/000490865>. [PubMed]. Retraction in: *Cell Physiol Biochem*. 2023; 57:543. <https://doi.org/10.33594/000000678>. [PubMed]
